# Supplementary material
Source: PubMed Central journal article supplement (PMC3864371)
Supplement: Supp_Figure1.pdf [file Supp_Figure1.pdf]

## Supplementary Data

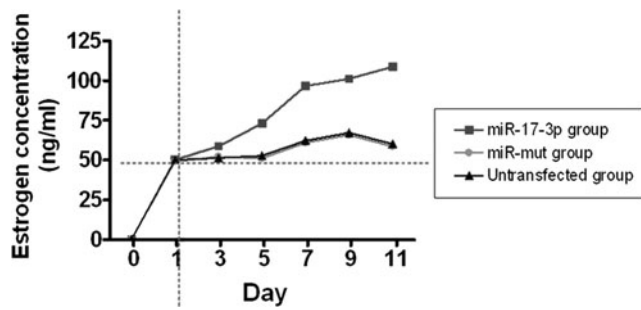

**SUPPLEMENTARY FIG. S1.** The ELISA assay was used to determine the estrogen responsiveness of the OSE-like cells *in vitro*. On days 1, 3, 5, 7, 9, and 11 after induction, the OSE-like cells culture medium were collected and were used for ELISA assay. We found the levels of estrogen in the cell culture medium of each group were not significantly different before induction ( $p > 0.05$ ,  $t$  test,  $n = 3$ ). However, on 5, 7, 9, and 11 days after induction, the levels of estrogen in the cell culture medium of each group significantly elevated in miR-17-3p-transfected iPS cells group ( $p < 0.01$ ,  $t$  test,  $n = 3$ ), compared to the miR-mut group and untransfected group.
